# Supplementary material
Source: Springer Nature journal article supplement (https://www.springermedizin.de/resource/supplementary/12992_2011_132_MOESM2_ESM.pdf/9616532)
Supplement: MOESM2 [file 9616532]

International Donors

Ministry of Health and Social Welfare

National Health Policy  
+  
Basic Package of Health  
Services

International  
NGOs

County Health  
Teams

Local NGOs
